# Supplementary material for: Pharmacokinetics and Glucodynamics of Ultra Rapid Lispro (URLi) versus Humalog® (Lispro) in Patients with Type 2 Diabetes Mellitus: A Phase I Randomised, Crossover Study
Source: PubMed Central journal article supplement — Clin Pharmacokinet. 2020 May 29;59(12):1601–10. doi: 10.1007/s40262-020-00901-2 (PMC7716902; doi:10.1007/s40262-020-00901-2), 2020-05-29
Supplement: 40262_2020_901_MOESM1_ESM.pdf [file 40262_2020_901_MOESM1_ESM.pdf]

**ELECTRONIC SUPPLEMENTARY MATERIAL (ESM):**

*Clinical Pharmacokinetics*

Pharmacokinetics and Glucodynamics of Ultra Rapid Lispro (URLi) versus Humalog® (Lispro) in Patients with Type 2 Diabetes Mellitus: A Phase 1 Randomised, Crossover Study

Leohr J, Dellva MA, Coutant DE, LaBell E, Heise T, Andersen G, Zijlstra E, Hermanski L, Nosek L, Linnebjerg H.

Corresponding author:

Jennifer Leohr,

Eli Lilly and Company, Lilly Corporate Center

Indianapolis, IN 46285

USA

Email: [leohr\\_jennifer\\_k@lilly.com](mailto:leohr_jennifer_k@lilly.com)

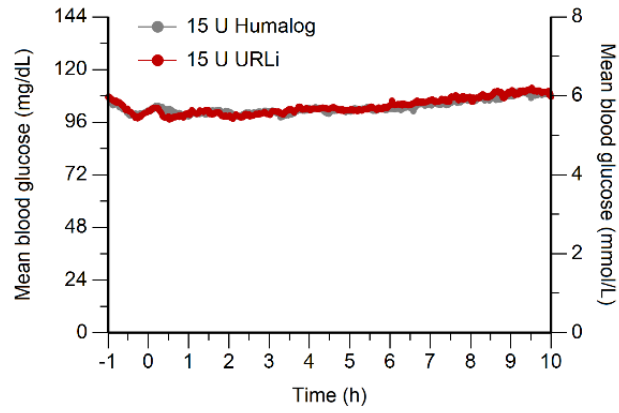

**Supplementary Fig. 1** Mean ( $\pm$ SE) blood glucose concentration profiles during euglycaemic clamp for URLi and Humalog  
*SE* standard error; *U*, units; *URLi* ultra rapid lispro.
